# Supplementary material for: Current Updates on the Role of Microbiome in Endometriosis: A Narrative Review
Source: MDPI journal article supplement (doi:10.3390/microorganisms11020360), 2023-01-31
Supplement: s1 [file s1]

Supplementary Table 1: Study characteristics reporting microbiome changes in endometriosis patients.

| References                 | Year | Study location | Mean age (years old)                                                        | Study period               | Sample size                                                                                   | Diagnosis                                                                                   | Microbiome analysis                                       |
|----------------------------|------|----------------|-----------------------------------------------------------------------------|----------------------------|-----------------------------------------------------------------------------------------------|---------------------------------------------------------------------------------------------|-----------------------------------------------------------|
| Akiyama et al., 2019       | 2019 | Japan          | Endometriosis: $33.9 \pm 5.7$<br>Control: $32.5 \pm 6.0$                    | N/A                        | Endometriosis: 30<br>Control: 39                                                              | Diagnosed via laparoscopic and pathology test (classified by rARSM score: Stage III and IV) | 16S rRNA analysis (V5-V6 Regions) on Ion Torrent Platform |
| Ata et al., 2019 [1]       | 2019 | Turkey         | *Endometriosis: 28.5 (range: 26 - 31.3)<br>Control: 27.5 (range: 25.8 - 30) | 2016 - 2017                | Endometriosis: 14<br>Control: 14                                                              | Classified based on the r-ASRM scores                                                       | 16S rRNA analysis (V3 and V4 region)                      |
| Chen et al., 2020 [2]      | 2020 | China          | $36.07 \pm 5.57$ (range: 18-45)                                             | April 2018 - February 2019 | 68 patients:<br>Cervical Canal: 67<br>Posterior Fornix: 65<br>Uterine Cavity (Endometrium): 2 | Confirmed via laparoscopic and pathology test                                               | 16S rRNA analysis (V3-V4 region)                          |
| Hernandes et al., 2020 [3] | 2020 | Brazil         | 18 - 50                                                                     | N/A                        | Endometriosis: 10<br>Control: 11                                                              | Confirmed with laparoscopic surgery and histopathology analysis                             | 16S rRNA analysis (V3-V4 region)                          |
| Wei et al., 2020 [4]       | 2020 | China          | 31.47 (range: 23 - 44)                                                      | N.A.                       | Endometriosis: 36<br>Control: 14                                                              | Confirmed with laparoscopic surgery and categorized based on r-ASRM                         | 16S rRNA analysis (V4-V5 region)                          |
| Perrotta et al., 2020 [5]  | 2020 | Brazil         | Endometriosis: $34.9 \pm 6.8$<br>Control: $35.25 \pm 6.9$                   | N.A.                       | Endometriosis: 35<br>Control: 24                                                              | Confirmed by TVUS or MRI or previous surgery                                                | 16S rRNA analysis (V4 region)                             |
| Lee et al., 2021 [6]       | 2021 | Korea          | Endometriosis: $36.20 \pm 1.30$<br>Control: $39.40 \pm 1.10$                | N/A                        | Endometriosis: 45<br>Control: 45                                                              | Confirmed by histological evaluation and classified according to r-ASRM                     | 16S rRNA analysis (V3-V4 region)                          |
| Le et al., 2021 [7]        | 2021 | United States  | Endometriosis: $32.5 \pm 1.1$<br>Control: $32.6 \pm 2.0$                    | N/A                        | Endometriosis: 20<br>Control: 9                                                               | Confirmed by laparoscopy/laparotomy and classified according to r-ASRM                      | 16S rRNA analysis (V4 region)                             |

|                                 |      |        |                                                                                   |                                        |                                   |                                                                                                                     |                                                                         |
|---------------------------------|------|--------|-----------------------------------------------------------------------------------|----------------------------------------|-----------------------------------|---------------------------------------------------------------------------------------------------------------------|-------------------------------------------------------------------------|
| Svensson et al.,<br>2021<br>[8] | 2021 | Sweden | Endometriosis: 37.8 (range:<br>32.8-43.3)<br>Control: 37.0 (range: 32.0-<br>44.0) | September 2016 -<br>N.A.               | Endometriosis: 66<br>Control: 198 | Confirmed by<br>laparoscopy/laparotomy and<br>classified according to ICD-<br>10 classification of<br>endometriosis | 16S rRNA analysis (V1-V3<br>region) on Illumina HiSeq<br>platform       |
| Wessels et al.,<br>2021<br>[9]  | 2021 | Canada | Endometriosis: 33.8 ± 5.8<br>Control: 35.1 ± 3.3                                  | 2011-2017                              | Endometriosis: 12<br>Control: 9   | Confirmed by laparoscopy<br>and pathology test, according<br>to r-ASRM score                                        | 16S rRNA analysis (V3<br>region) on Illumina MiSeq<br>platform          |
| Huang et al.,<br>2021<br>[10]   | 2021 | China  | Endometriosis: 38.3 ± 7.88<br>Control: 34.0 ± 10.8                                | June 2019 - October<br>2019            | Endometriosis: 21<br>Control: 20  | Confirmed by laparoscopy<br>and pathology test                                                                      | 16S rRNA analysis (V4<br>region) on Ion Torrent<br>platform             |
| Shan et al.,<br>2021<br>[11]    | 2021 | China  | Endometriosis/Control: 32<br>± 2, 32 ± 3                                          | March 2019 -<br>September 2019         | Endometriosis: 12<br>Control: 12  | Confirmed by histology,<br>according to r-ASRM score                                                                | 16S rRNA analysis (V3-V4<br>region) on Illumina MiSeq<br>platform       |
| Chao et al.,<br>2021<br>[12]    | 2021 | China  | Endometriosis: 39.89 ± 6.24<br>Control: 38.23 ± 7.80                              | July 2017 - December<br>2018           | Endometriosis: 37<br>Control: 66  | Confirmed by exploratory<br>laparoscopy or surgical<br>pathology                                                    | 16S rRNA analysis (V4<br>region) on Illumina platform                   |
| Chang et al.,<br>2022<br>[13]   | 2022 | Taiwan | Endometriosis: 35.4 ± 6.7<br>Control: N.A.                                        | N.A.                                   | Endometriosis: 23<br>Control: 10  | Based on r-ASRM score                                                                                               | 16S rRNA analysis (V3, V4,<br>V5 and V9 region) on<br>Illumina platform |
| Oishi et al.,<br>2022<br>[14]   | 2022 | Japan  | Endometriosis: 37.9 ± 6.4<br>Control: 35.2 ± 8.6                                  | July 2019 - April 2020                 | Endometriosis: 18<br>Control: 18  | Based on r-ASRM score                                                                                               | 16S rRNA analysis (V1-V2<br>region) on Illumina MiSeq<br>platform       |
| Yuan et al.,<br>2022<br>[15]    | 2022 | China  | Endometriosis: 35.28 ± 7.24<br>Control: 33.32 ± 8.04                              | January 2019 -<br>December 2019        | Endometriosis: 36<br>Control: 25  | Confirmed via laparoscopy<br>and pathology test<br>(diagnosed as I-IV stages)                                       | 16S rRNA analysis (V4<br>region) on Illumina HiSeq<br>platform          |
| Lu et al., 2022<br>[16]         | 2022 | China  | Endometriosis: 36.75 ± 7.11<br>Control: 35 ± 6.61                                 | 30 September 2020 -<br>31st March 2021 | Endometriosis: 16<br>Control: 18  | Confirmed by imaging and<br>pathology after surgery,<br>according to r-ASRM score                                   | 16S rRNA analysis (V4<br>region) on Illumina HiSeq<br>platform          |

## References

1. Ata, B.; Yildiz, S.; Turkgeldi, E.; Brocal, V.P.; Dinleyici, E.C.; Moya, A.; Urman, B. The endobiota study: comparison of vaginal, cervical and gut microbiota between women with stage 3/4 endometriosis and healthy controls. *Scientific reports* **2019**, *9*, 1-9.
2. Chen, S.; Gu, Z.; Zhang, W.; Jia, S.; Wu, Y.; Zheng, P.; Dai, Y.; Leng, J. Microbiome of the lower genital tract in Chinese women with endometriosis by 16s-rRNA sequencing technique: a pilot study. *Ann Transl Med* **2020**, *8*, 1440, doi:10.21037/atm-20-1309.
3. Hernandez, C.; Silveira, P.; Rodrigues Sereia, A.F.; Christoff, A.P.; Mendes, H.; Valter de Oliveira, L.F.; Podgaec, S. Microbiome Profile of Deep Endometriosis Patients: Comparison of Vaginal Fluid, Endometrium and Lesion. *Diagnostics (Basel)* **2020**, *10*, doi:10.3390/diagnostics10030163.
4. Wei, W.; Zhang, X.; Tang, H.; Zeng, L.; Wu, R. Microbiota composition and distribution along the female reproductive tract of women with endometriosis. *Ann Clin Microbiol Antimicrob* **2020**, *19*, 15, doi:10.1186/s12941-020-00356-0.
5. Perrotta, A.R.; Borrelli, G.M.; Martins, C.O.; Kallas, E.G.; Sanabani, S.S.; Griffith, L.G.; Alm, E.J.; Abrao, M.S. The vaginal microbiome as a tool to predict rASRM stage of disease in endometriosis: a pilot study. *Reproductive Sciences* **2020**, *27*, 1064-1073.
6. Lee, S.R.; Lee, J.C.; Kim, S.H.; Oh, Y.S.; Chae, H.D.; Seo, H.; Kang, C.S.; Shin, T.S. Altered Composition of Microbiota in Women with Ovarian Endometrioma: Microbiome Analyses of Extracellular Vesicles in the Peritoneal Fluid. *Int J Mol Sci* **2021**, *22*, doi:10.3390/ijms22094608.
7. Le, N.; Cregger, M.; Fazleabas, A.; Braundmeier-Fleming, A. Effects of endometriosis on immunity and mucosal microbial community dynamics in female olive baboons. *Sci Rep* **2022**, *12*, 1590, doi:10.1038/s41598-022-05499-y.
8. Svensson, A.; Brunkwall, L.; Roth, B.; Orho-Melander, M.; Ohlsson, B. Associations between endometriosis and gut microbiota. *Reproductive Sciences* **2021**, *28*, 2367-2377.
9. Wessels, J.M.; Domínguez, M.A.; Leyland, N.A.; Agarwal, S.K.; Foster, W.G. Endometrial microbiota is more diverse in people with endometriosis than symptomatic controls. *Scientific reports* **2021**, *11*, 1-12.
10. Huang, L.; Liu, B.; Liu, Z.; Feng, W.; Liu, M.; Wang, Y.; Peng, D.; Fu, X.; Zhu, H.; Cui, Z., et al. Gut Microbiota Exceeds Cervical Microbiota for Early Diagnosis of Endometriosis. *Front Cell Infect Microbiol* **2021**, *11*, 788836, doi:10.3389/fcimb.2021.788836.
11. Shan, J.; Ni, Z.; Cheng, W.; Zhou, L.; Zhai, D.; Sun, S.; Yu, C. Gut microbiota imbalance and its correlations with hormone and inflammatory factors in patients with stage 3/4 endometriosis. *Arch Gynecol Obstet* **2021**, *304*, 1363-1373, doi:10.1007/s00404-021-06057-z.
12. Chao, X.; Liu, Y.; Fan, Q.; Shi, H.; Wang, S.; Lang, J. The role of the vaginal microbiome in distinguishing female chronic pelvic pain caused by endometriosis/adenomyosis. *Ann Transl Med* **2021**, *9*, 771, doi:10.21037/atm-20-4586.
13. Chang, C.Y.; Chiang, A.J.; Lai, M.T.; Yan, M.J.; Tseng, C.C.; Lo, L.C.; Wan, L.; Li, C.J.; Tsui, K.H.; Chen, C.M., et al. A more diverse cervical microbiome associates with better clinical outcomes in patients with endometriosis: A pilot study. *Biomedicine* **2022**, *10*, doi:10.3390/biomedicine10010174.
14. Oishi, S.; Mekaru, K.; Tanaka, S.E.; Arai, W.; Ashikawa, K.; Sakuraba, Y.; Nishioka, M.; Nakamura, R.; Miyagi, M.; Akamine, K. Microbiome analysis in women with endometriosis: Does a microbiome exist in peritoneal fluid and ovarian cystic fluid? *Reproductive medicine and biology* **2022**, *21*, e12441.
15. Yuan, W.; Wu, Y.; Chai, X.; Wu, X. The colonized microbiota composition in the peritoneal fluid in women with endometriosis. *Arch Gynecol Obstet* **2022**, *305*, 1573-1580, doi:10.1007/s00404-021-06338-7.

16. Lu, F.; Wei, J.; Zhong, Y.; Feng, Y.; Ma, B.; Xiong, Y.; Wei, K.; Tan, B.; Chen, T. Antibiotic Therapy and Vaginal Microbiota Transplantation Reduce Endometriosis Disease Progression in Female Mice via NF-kappaB Signaling Pathway. *Front Med (Lausanne)* **2022**, *9*, 831115, doi:10.3389/fmed.2022.831115.
